# Supplementary material
Source: publisher figshare collection journal article supplement (https://tandf.figshare.com/ndownloader/files/17590880)

**A Rapid Synthesis of 1-Chloro-2-Arylcyclohexenes using MWAOS in Aqueous Media: Single Crystal Studies of Two Representative Compounds**

Jeevan Chakravarthy, A. S.1,2, Noor Shahina Begum1*, Krishnamurthy, M. S.1 and HariPrasad, S2*.

1 Department of Chemistry, Sneha Bhavan, Jnana Bharathi Campus, Bangalore University, Bangalore, 560056, India

2 Department of Chemistry, Central College Campus, Bengaluru Central University, Bengaluru, 560001, India.

* Corresponding authors:

Tel: + (91) (080) (22961351).

e-mail: [*hariprasad@bub.ernet.in*](mailto:hariprasad@bub.ernet.in) (S. HariPrasad);

[*noorsb@rediffmail.com*](mailto:noorsb@rediffmail.com) (Noor Sahina Begum)

Table of Contents

- Copies of IR, MS, 1H NMR and 13C NMR for compounds **1**, **2j** and **2k S3**

**Instrumentation**

Microwave reactions were performed using CEM DISCOVER-SP W/ACTIVENT (Matthews NC, USA) microwave reactor model no 909155, in a 5 mL reactor vials with stirring option, using Teflon caps, under completely sealed environment with reactor specifications: Voltage - 180/240 V AC; Max Cur. - 6.3 A; Freq. - 50/60Hz; Mag. Freq.-2455 MHz; Max Microwave power - 300W; Max power output option – 1100Hz. The reaction temperature, 80 °C, was reached in a ramp time of 2 minutes and hold time was set for 5 minutes.

Preliminary gas chromatograms were recorded using a Mayura 9800 gas chromatograph using nitrogen as inert carrier gas with OV-101 SS 2m x 1/8” column, using the temperature program 80 oC (2 mins. hold, 5 oC/min. increase to 180 oC, 12 mins. hold); injector temperature 200 oC, detector temperature 220 oC.

Elemental analyses were obtained with a VarioMicro Cube V1.9.7 CHNS mode elemental analyzer.

IR spectra were recorded on Shimadzu FT-IR 8400S (KBr die method); Cary 630 FT-IR, Bruker ALPHA-P spectrometers (ATR) and the values are reported in wave number (cm−1).

EI-MS spectra were obtained using Perkin Elmer Clarus 680 C, employing a fused silica column, packed with Elite-5MS (5% biphenyl 95% dimethylpolysiloxane, 30 m × 0.25 mm ID × 250μm df). The components were separated using Helium as carrier gas at a constant flow of 1 mL/min. The 1μL of extract sample injected into the instrument with oven temperature programme [Ing. 260 °C, 60 °C (2 mins.), 10 °C/min. rise to 300 °C (6 mins.)]. The mass detector conditions, transfer line temperature and ion source temperature 240 °C; and ionization mode electron impact at 70 eV, scan time 0.2 sec and scan interval of 0.1 sec, The fragments with 40 to 600 Da.

1H NMR and 13C NMR were obtained on a Bruker AMX 400 spectrometer using CDCl3 with tetramethylsilane as internal standard. Chemical shifts are reported in 𝛿 (ppm downfield) with reference to tetramethylsilane.

**1: IR of 1-chloro-2-tosylcyclohexene**

**
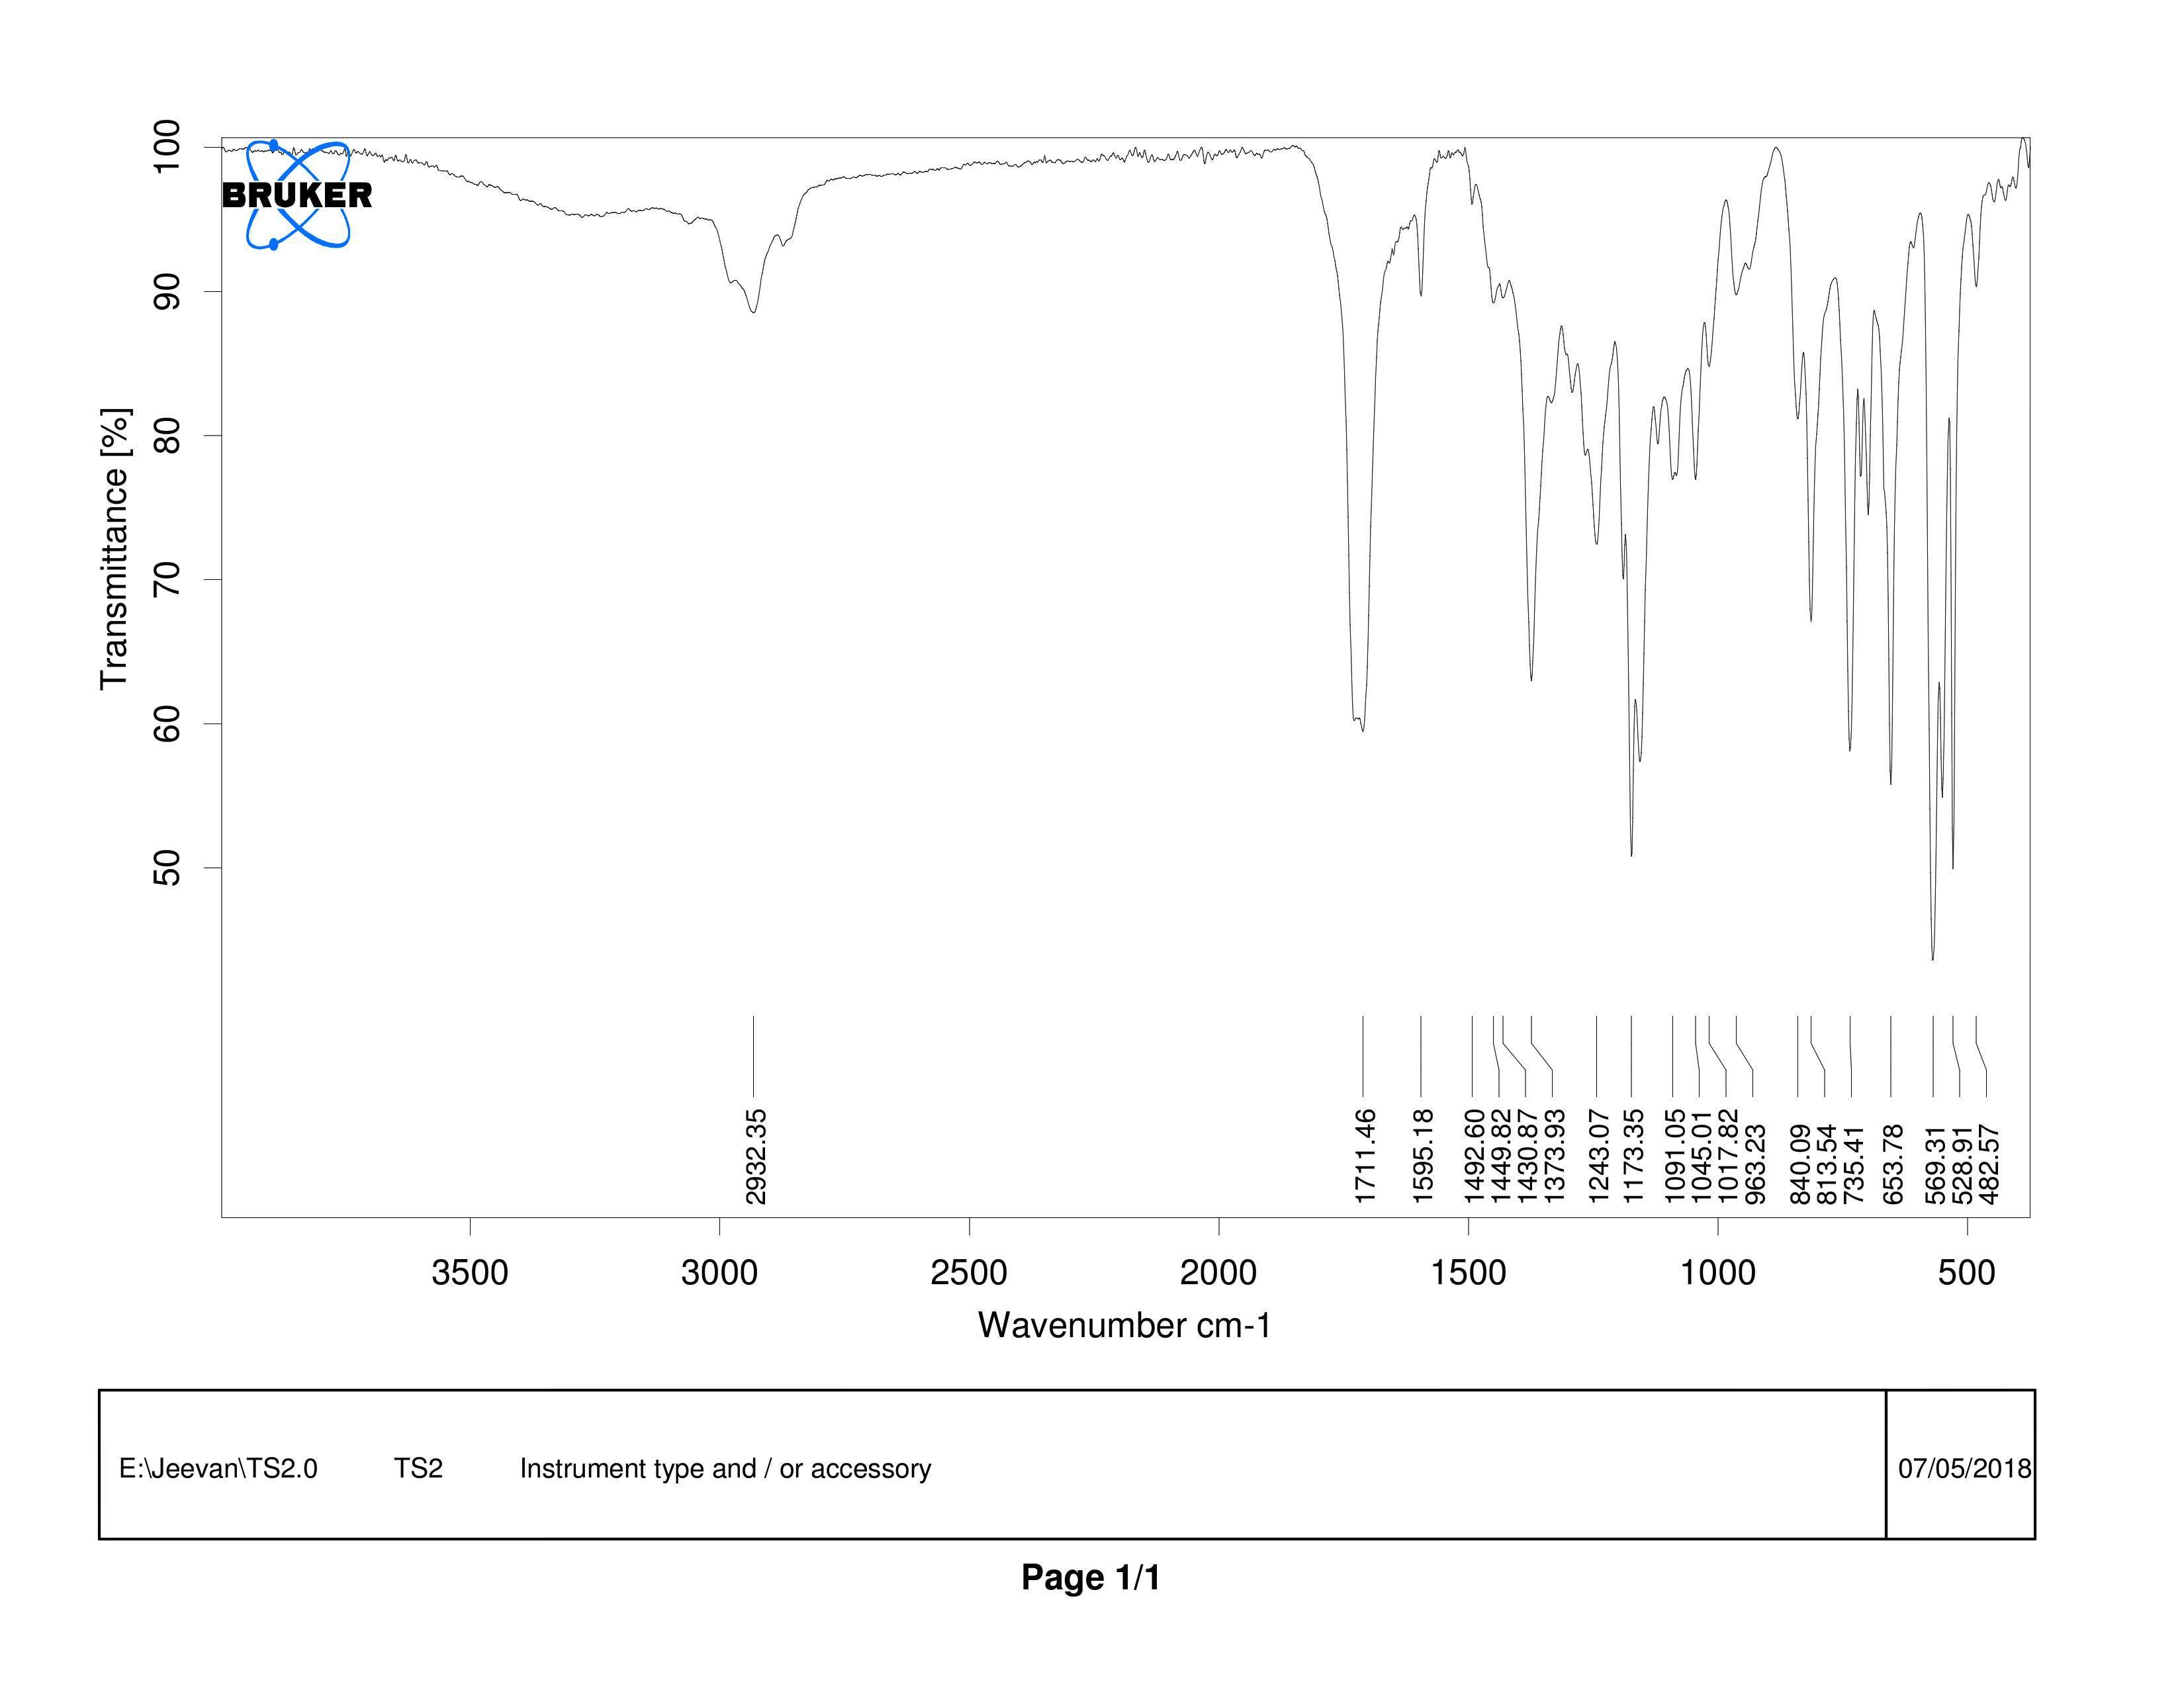
**

**1: MS of 1-chloro-2-tosylcyclohexene**

**
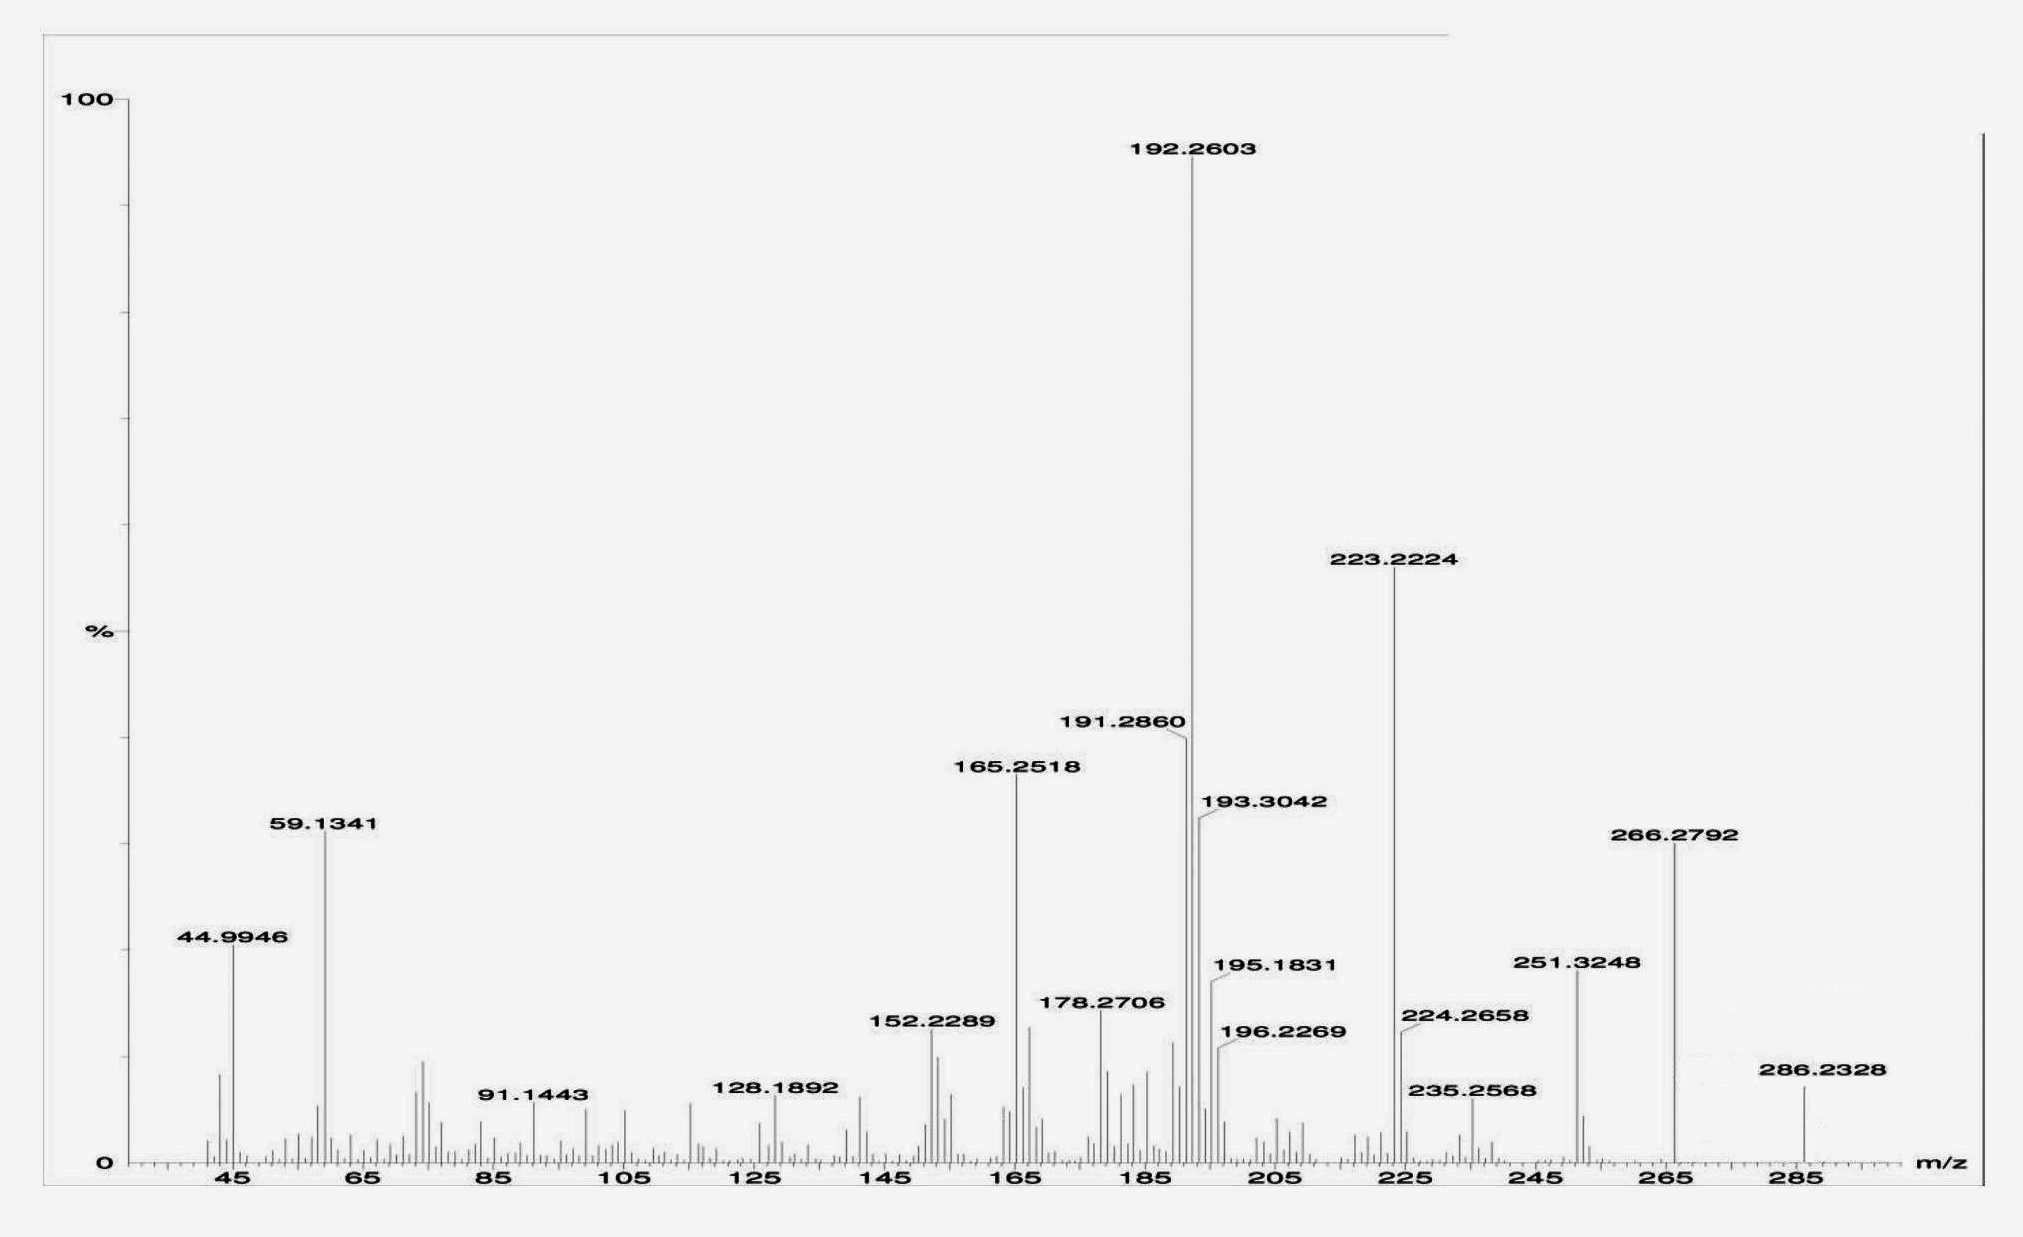
**

**1: 1H NMR of 1-chloro-2-tosylcyclohexene**


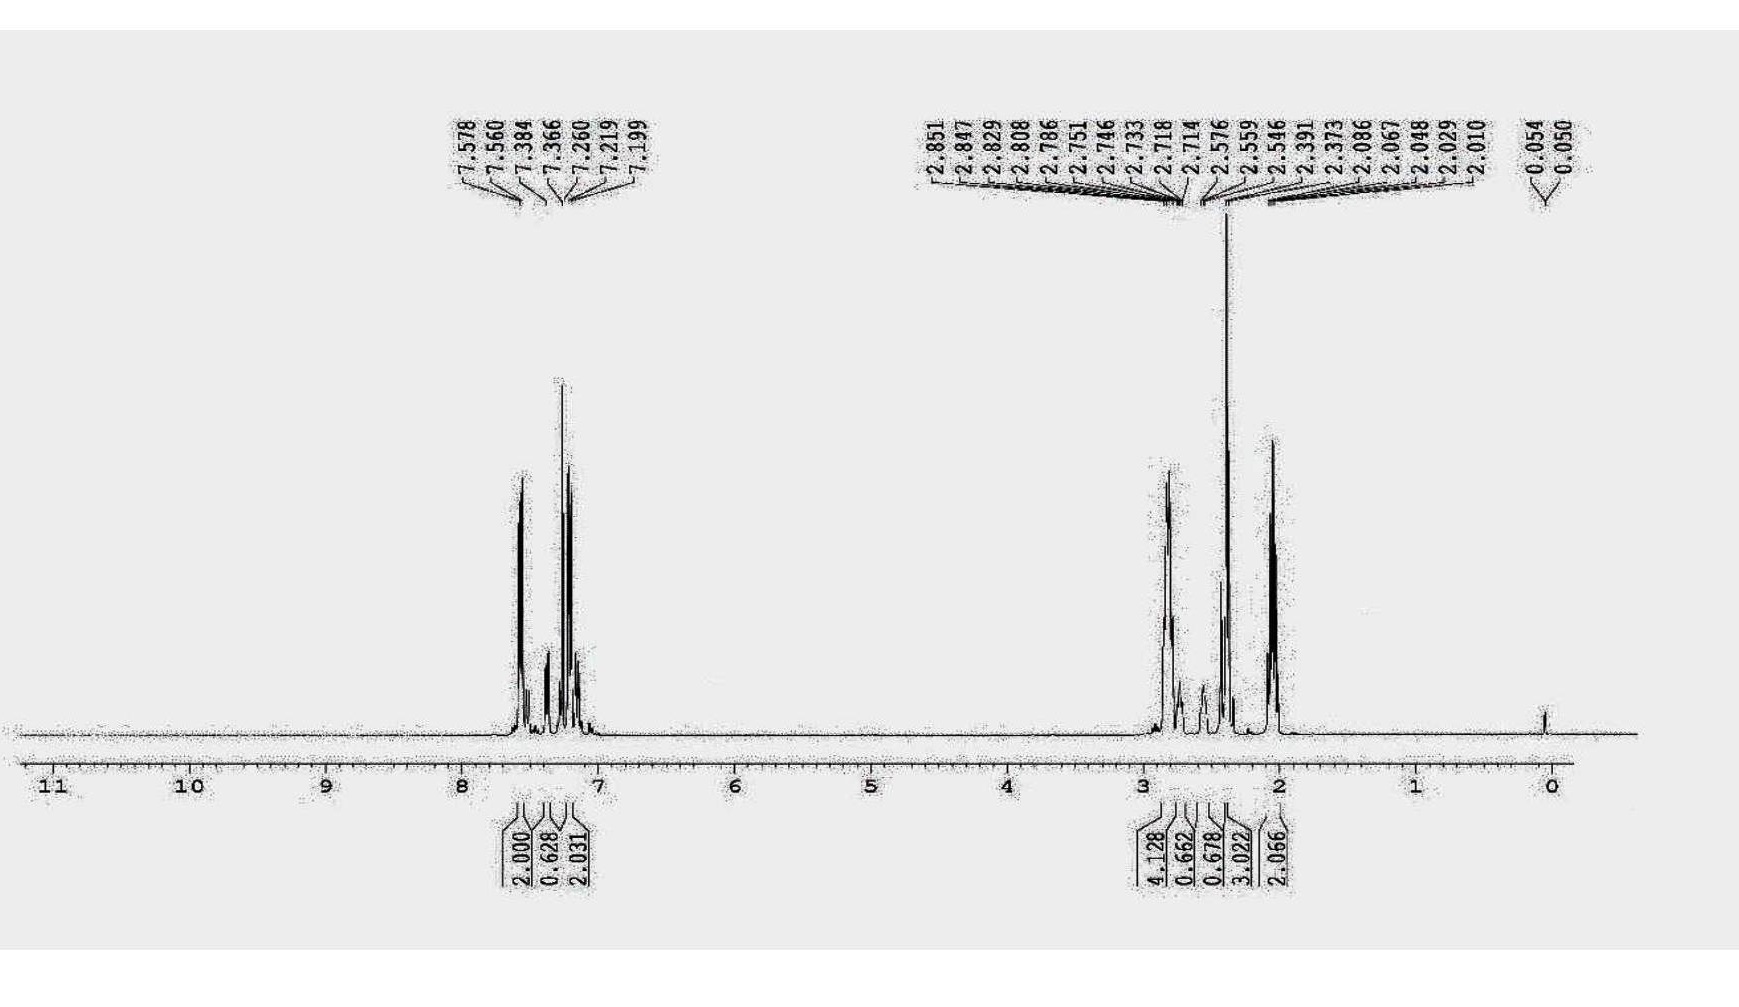


**1:** **13C NMR of 1-chloro-2-tosylcyclohexene**


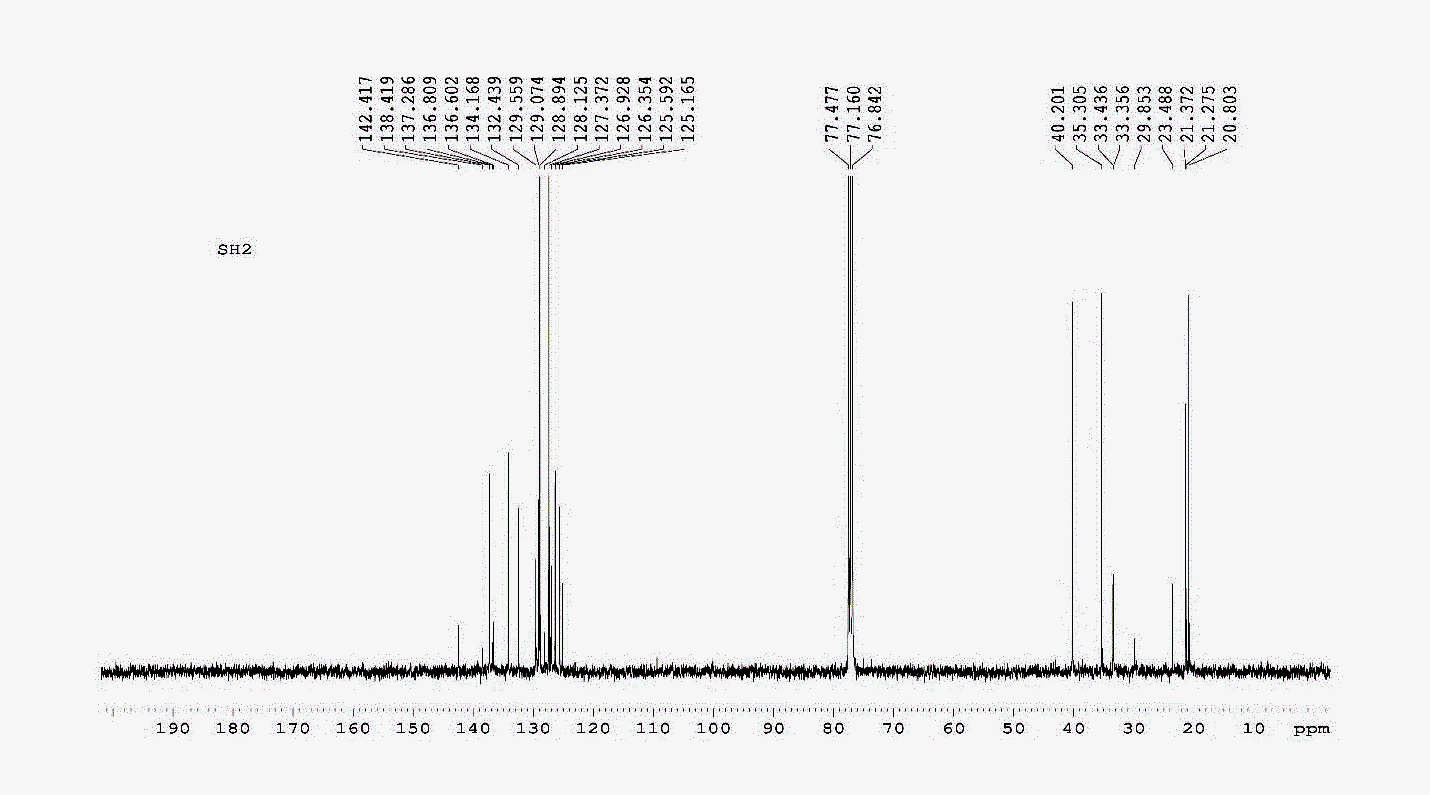


**2j: IR of 1-chloro-2-(4′-biphenyl)cyclohexene**

**
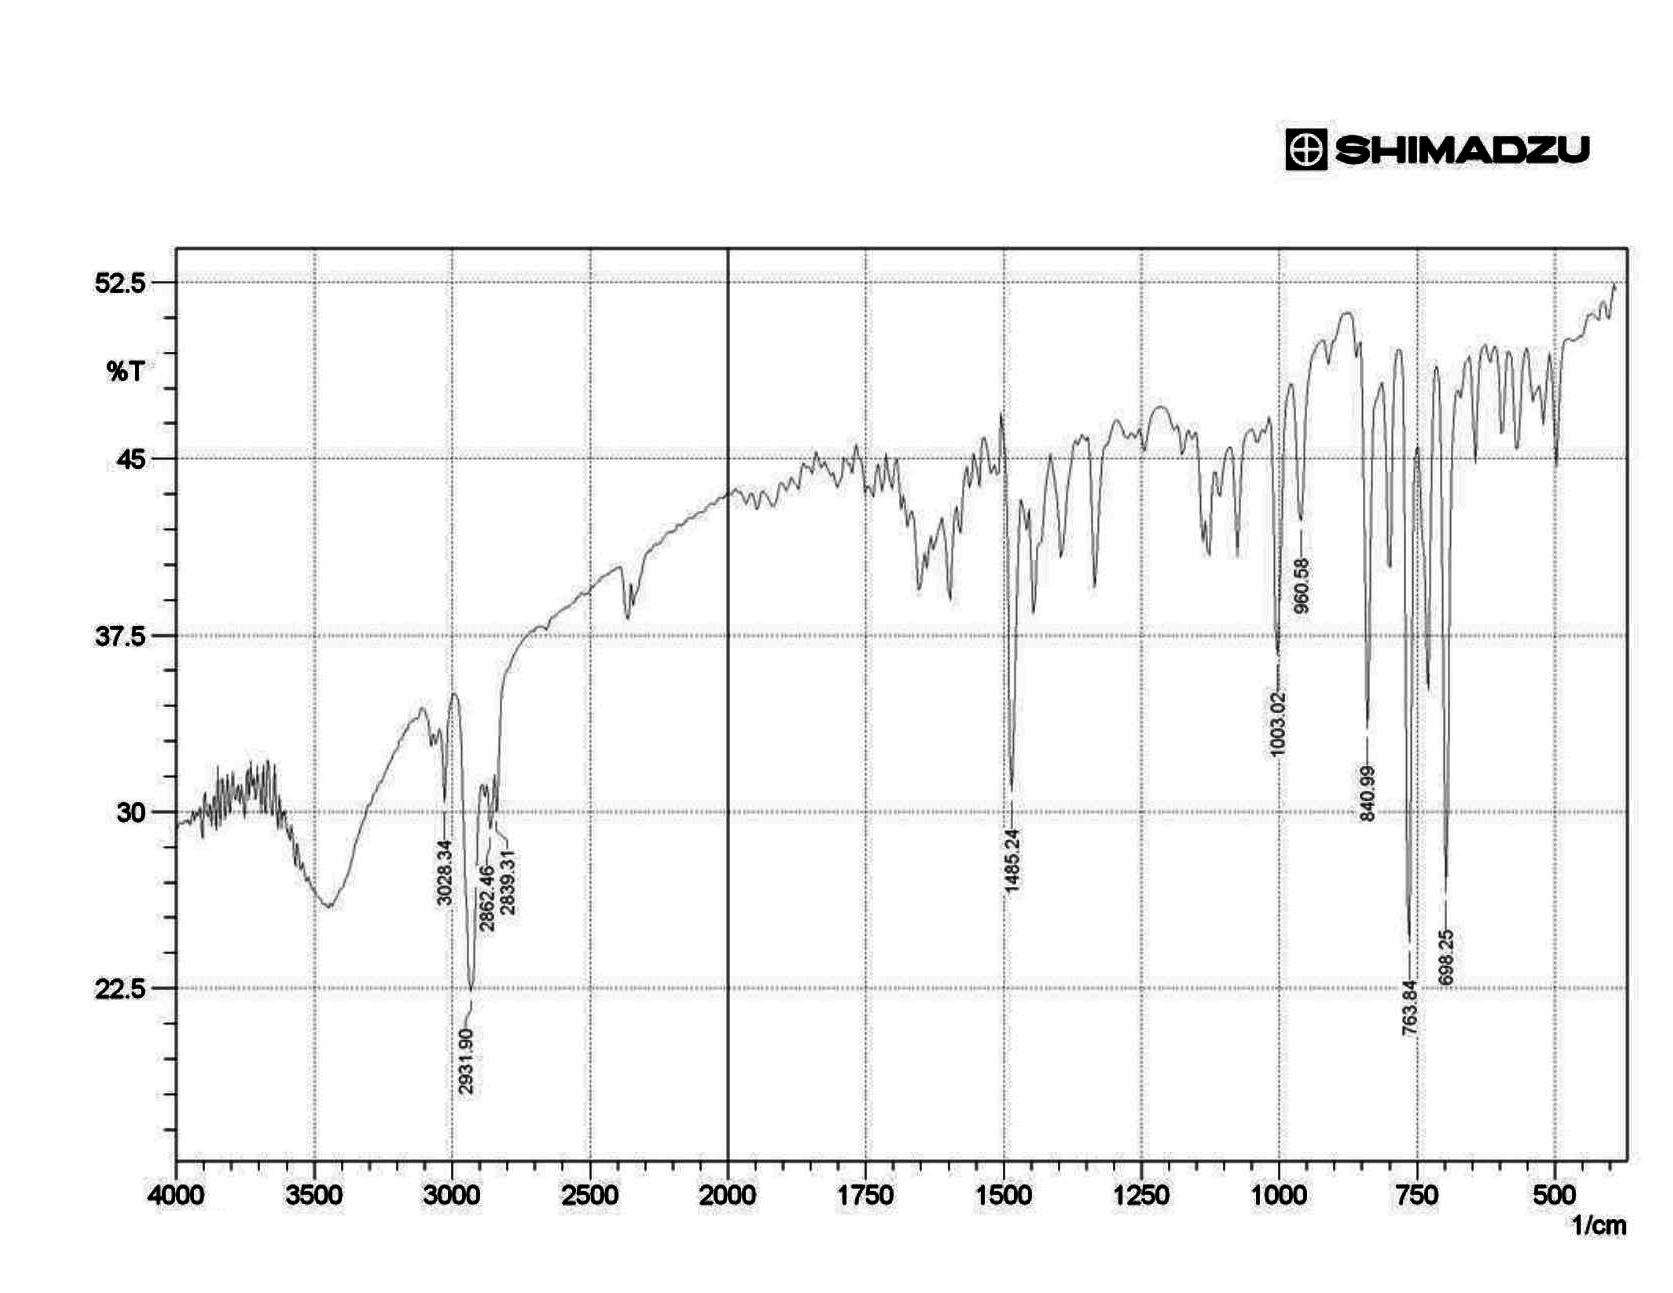
**

**2j: MS of 1-chloro-2-(4′-biphenyl)cyclohexene**

**
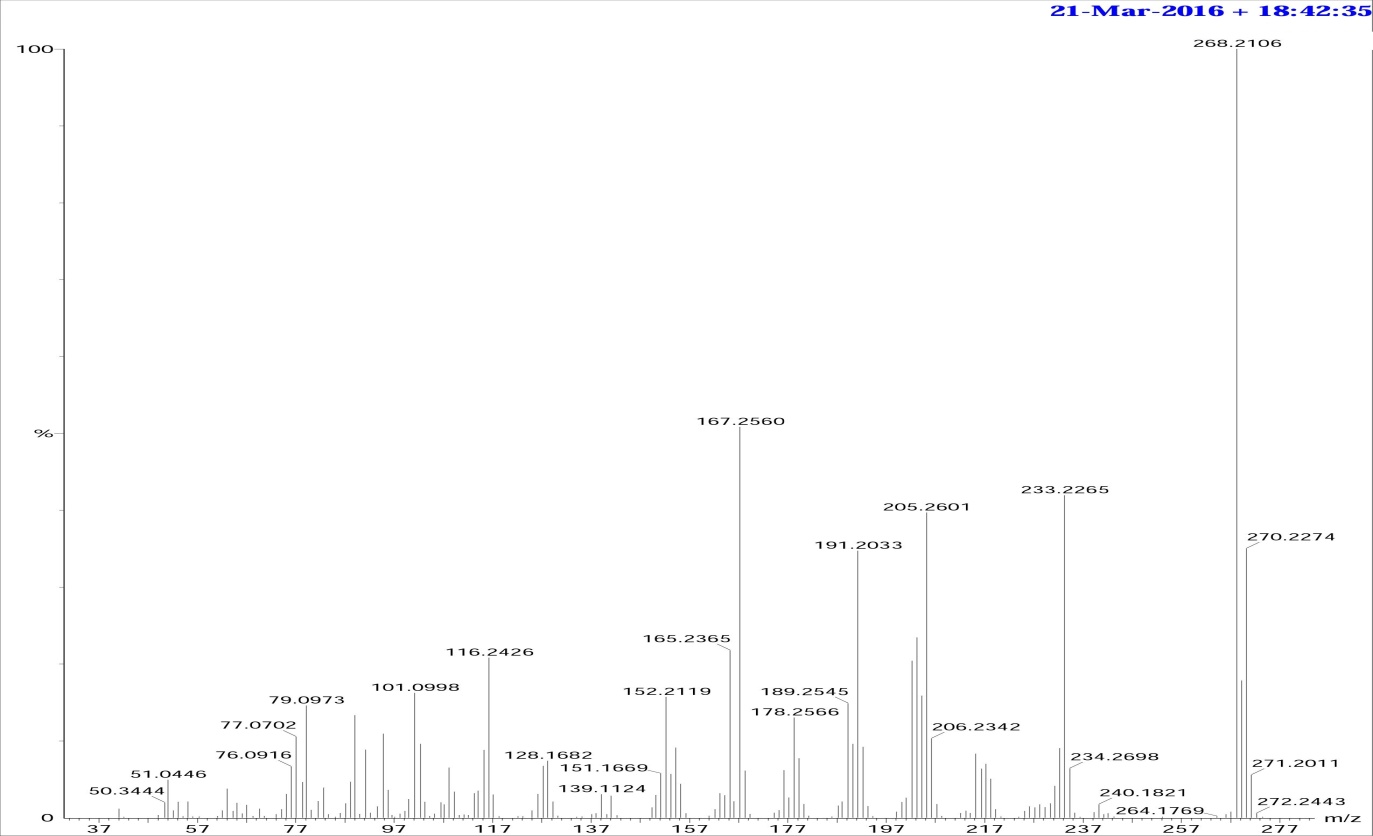
**

**2j: 1H NMR of 1-chloro-2-(4′-biphenyl)cyclohexene**

**
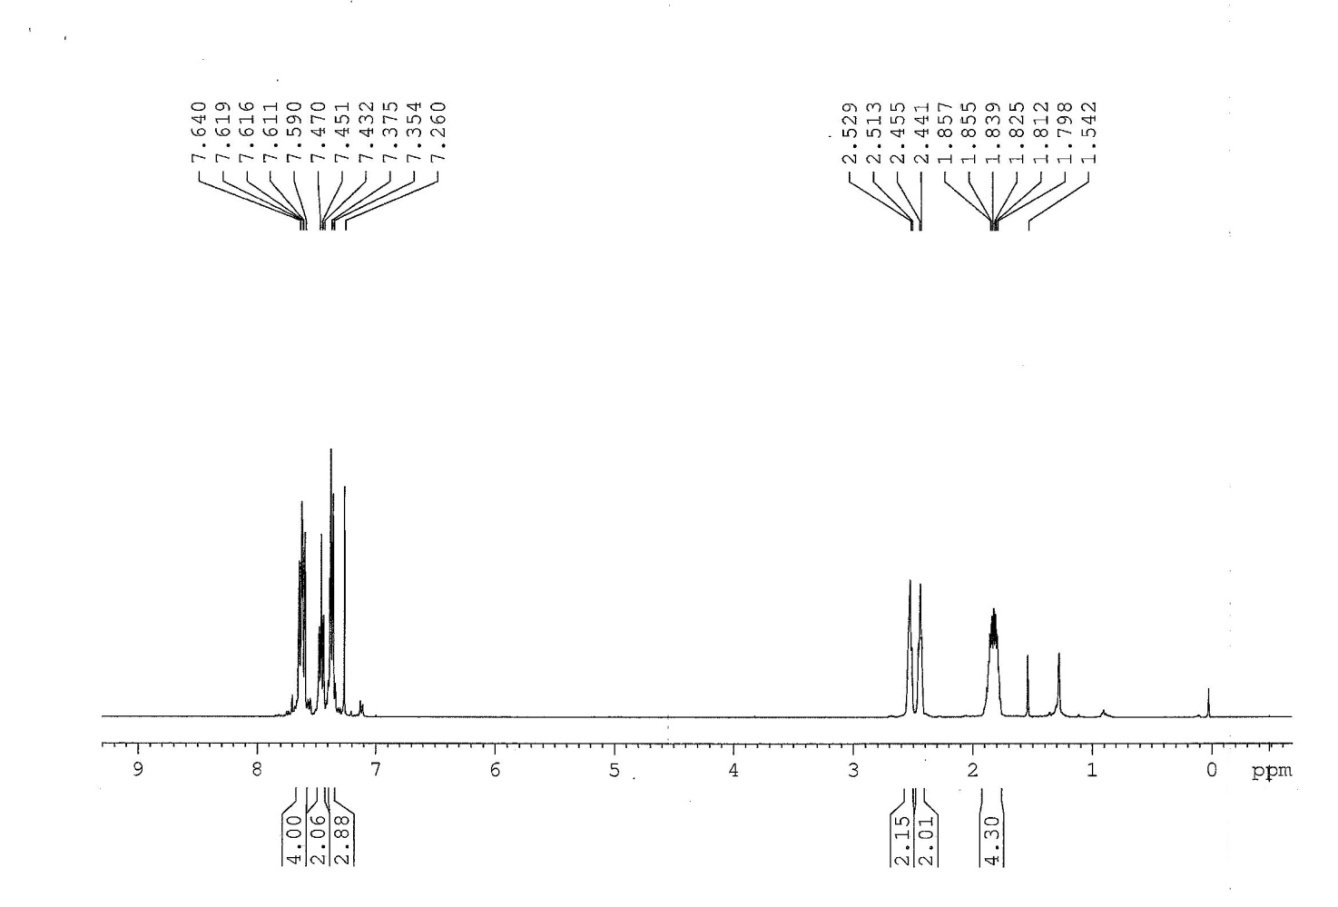
**

**2j: 13C NMR of 1-chloro-2-(4′-biphenyl)cyclohexene**

**
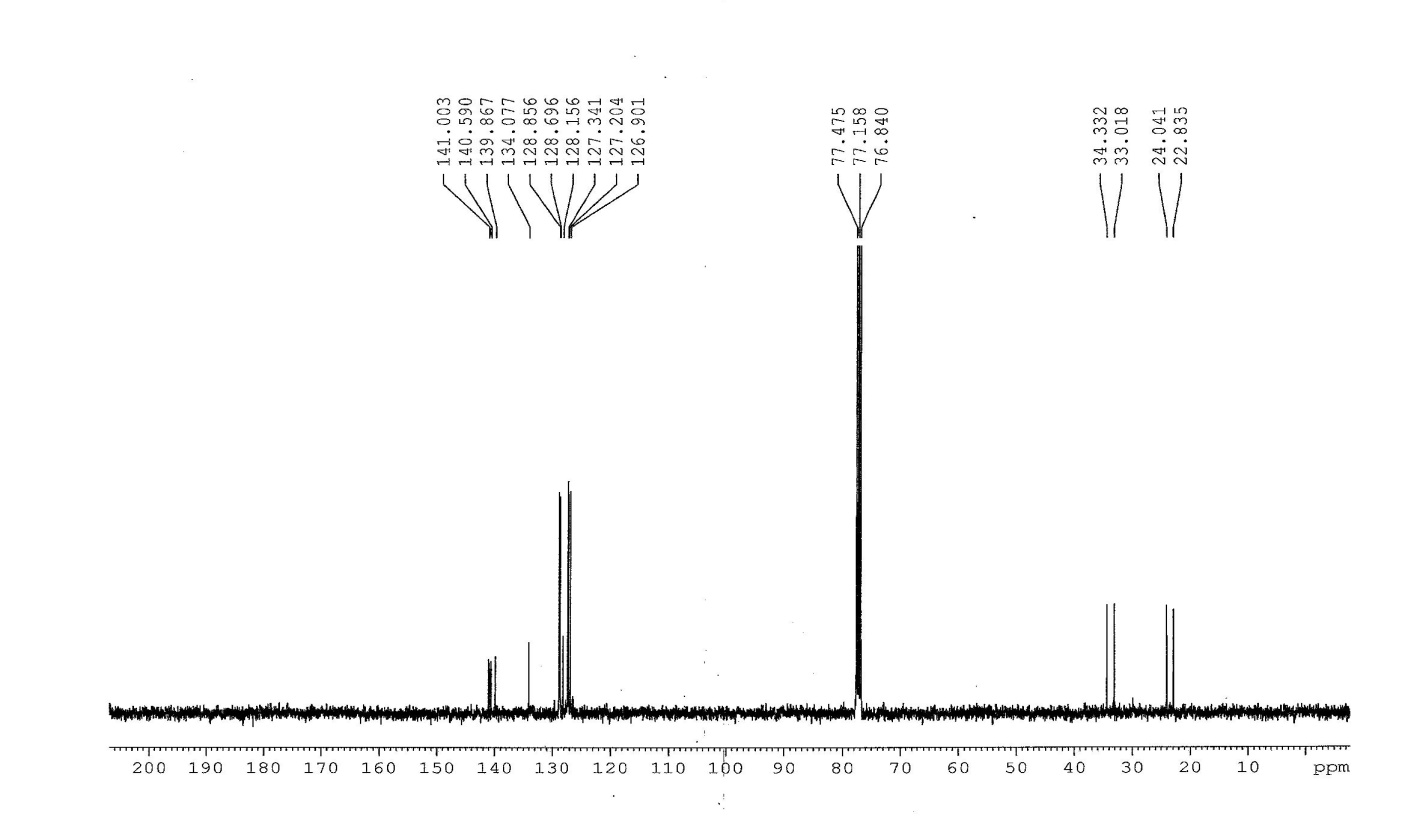
**

**2k: IR of 1-chloro-2-(1-napthyl)cyclohexene**


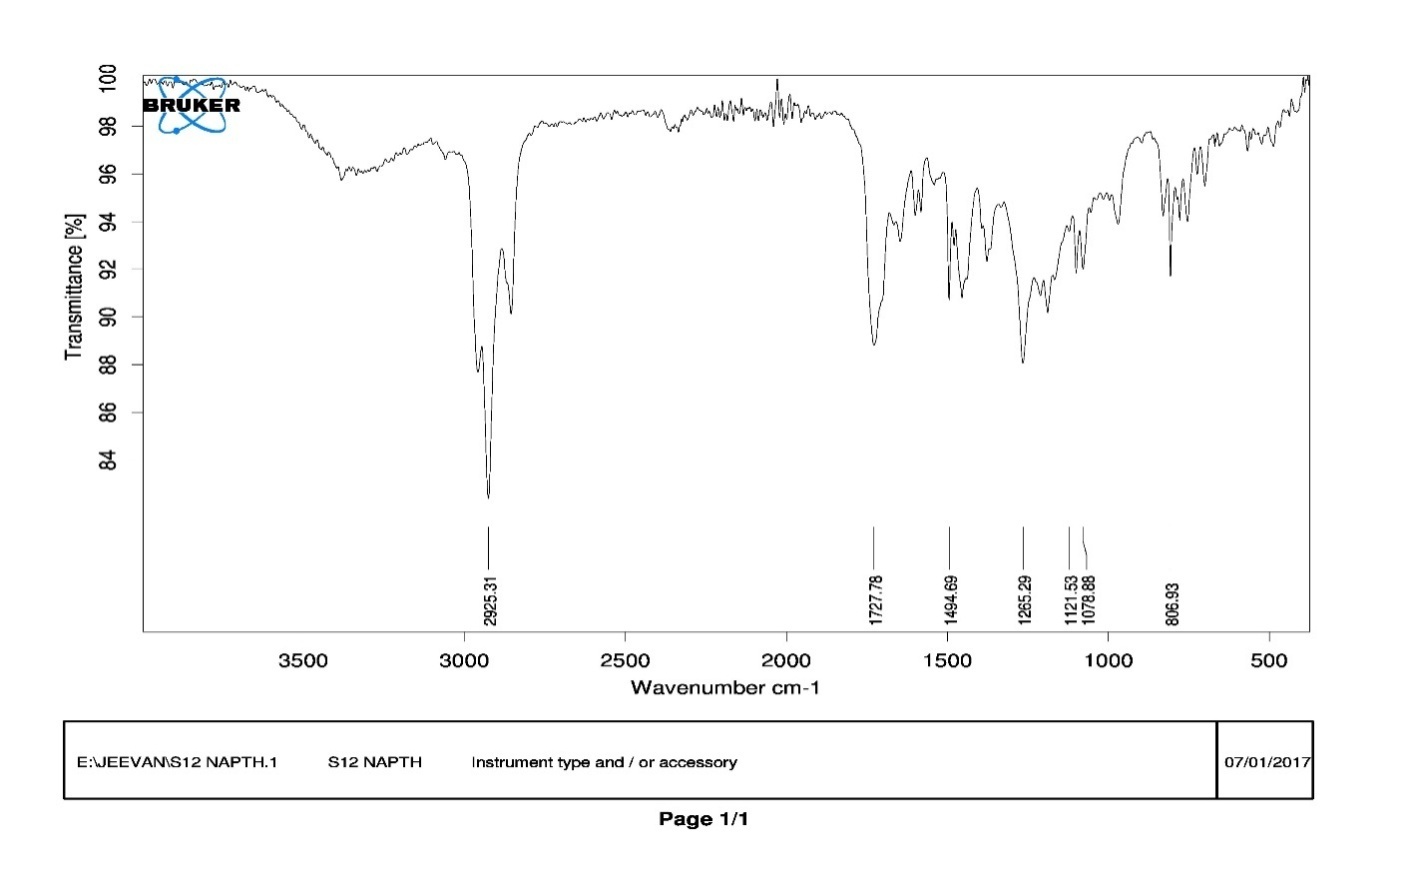


**2k: MS of 1-chloro-2-(1-napthyl)cyclohexene**


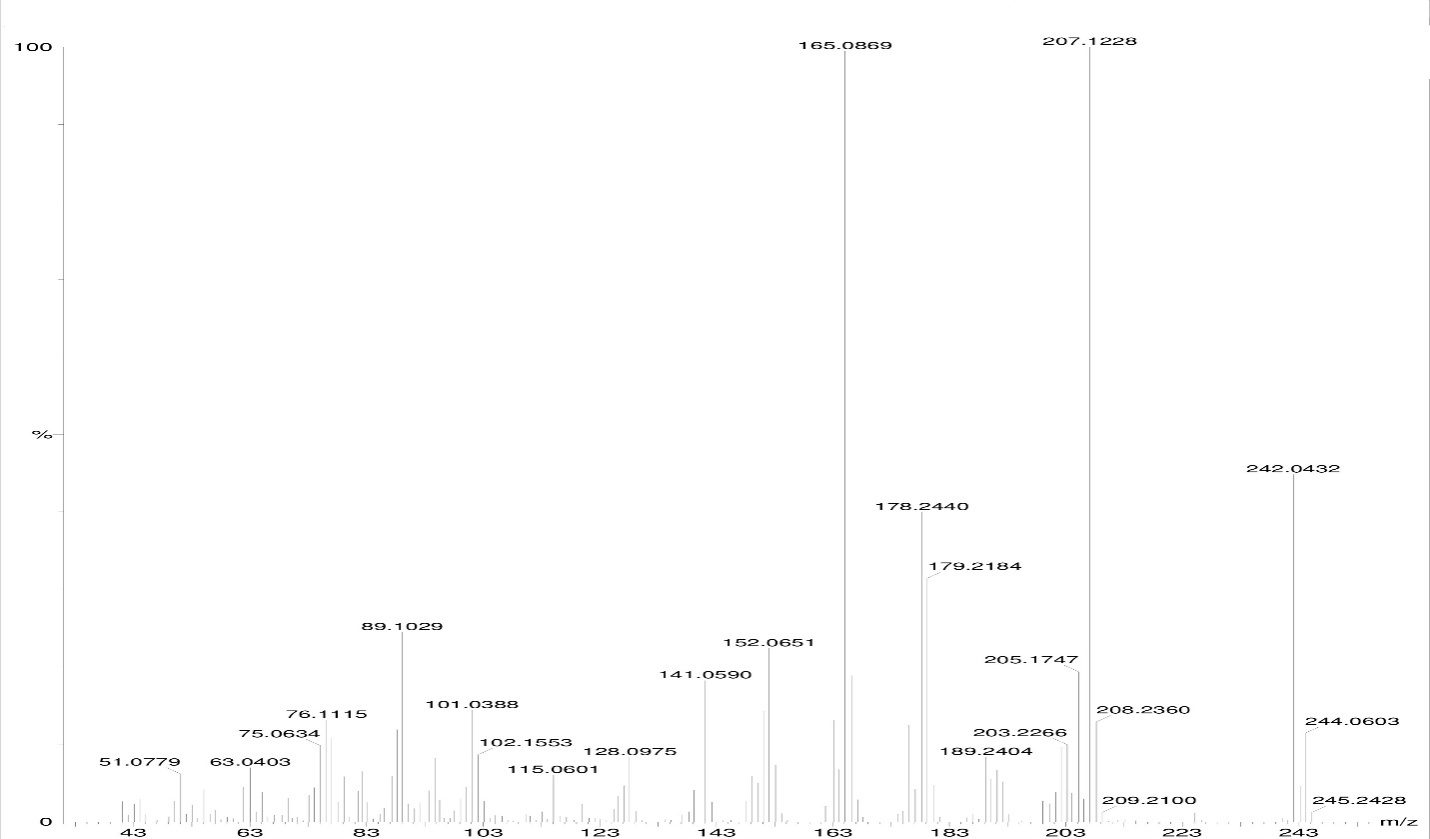


**2k: 1H NMR of 1-chloro-2-(1-napthyl)cyclohexene**


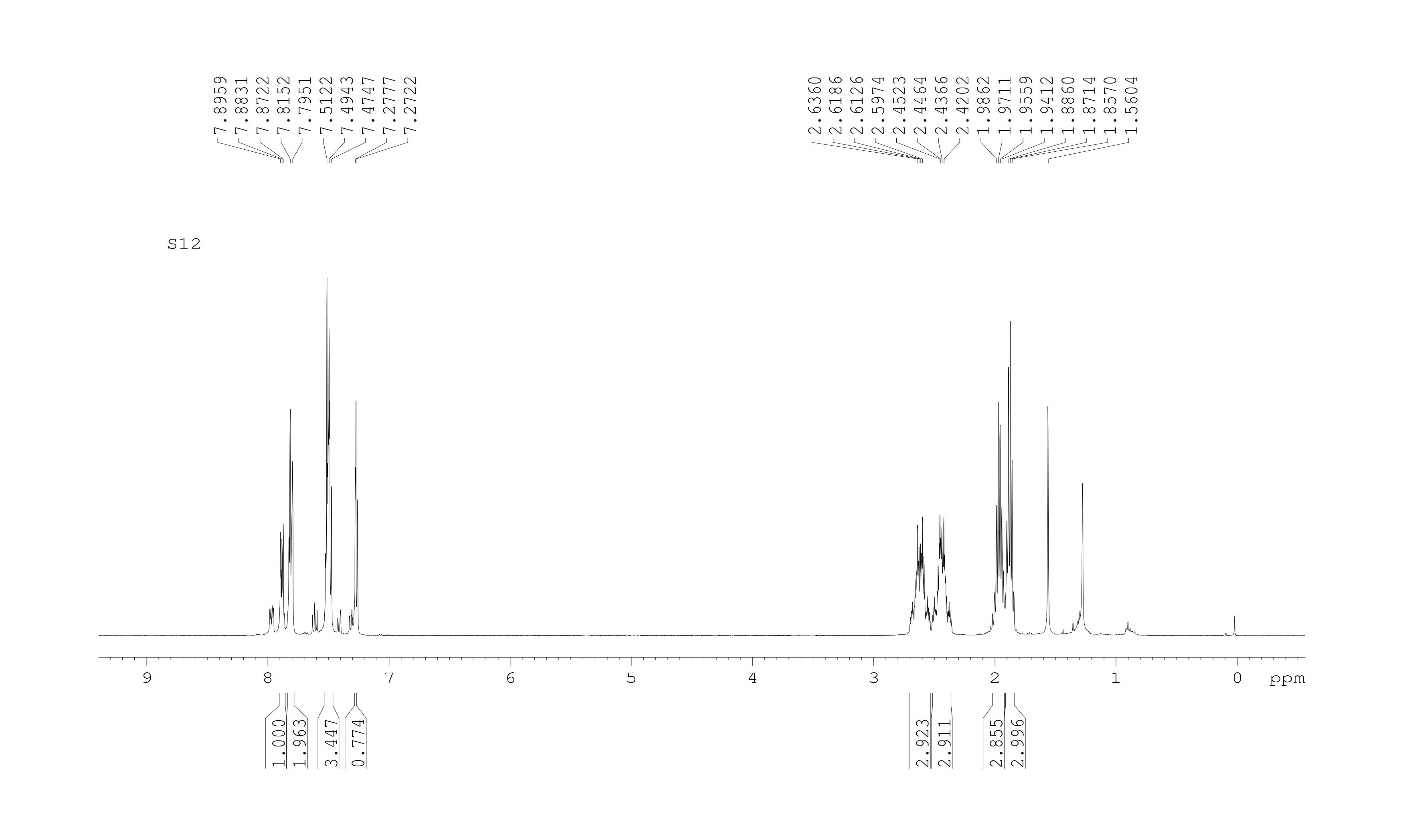


**2k: 13C NMR of 1-chloro-2-(1-napthyl)cyclohexene**


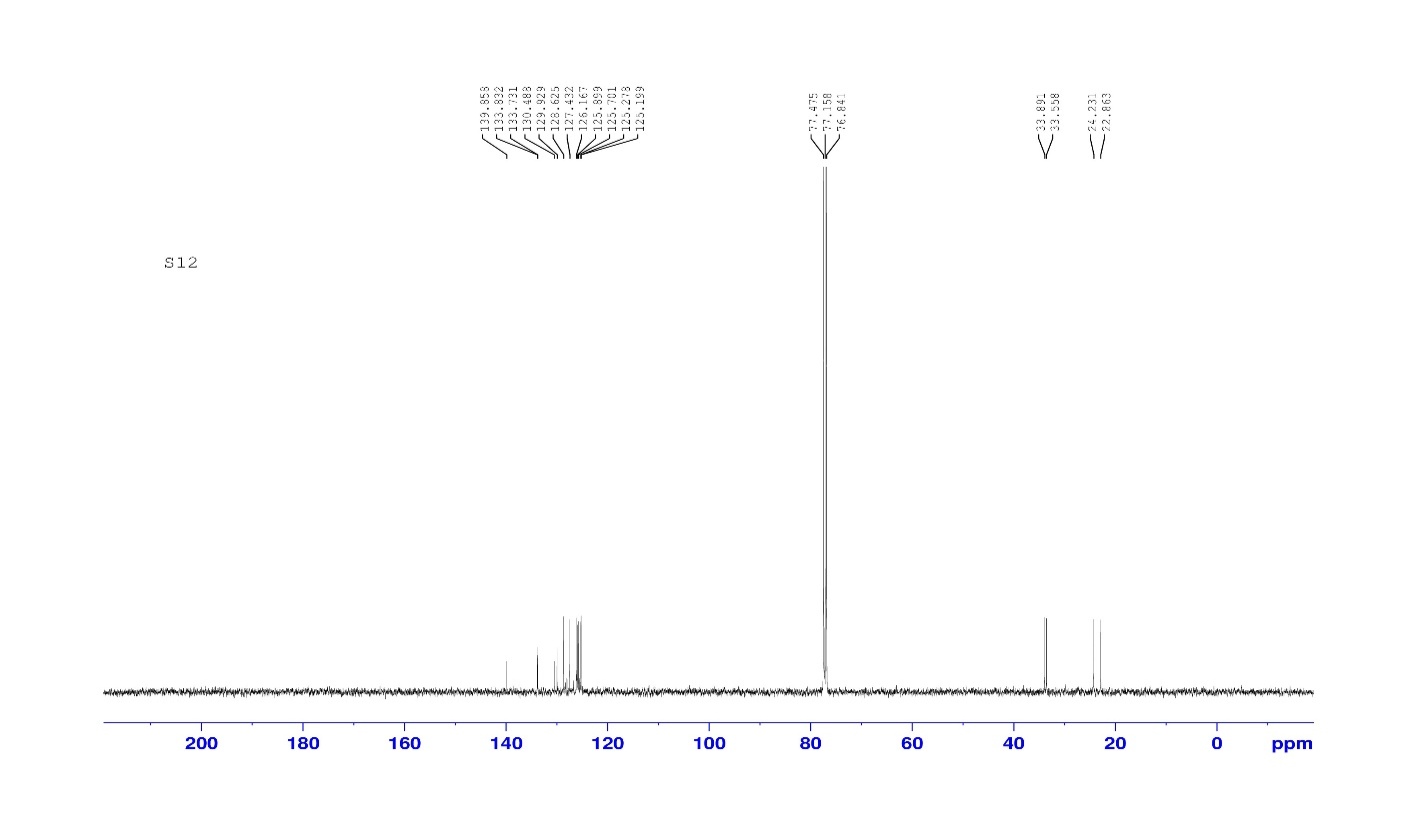

Supplement: Supplementary file 1 [file 17590880]
